# Supplementary material for: Sulfur-doped wood-derived porous carbon for optimizing electromagnetic response performance
Source: Royal Society of Chemistry journal article supplement (doi:10.1039/d1nr04232g), 2021-01-01
Supplement: d1nr04232g1.pdf [file d1nr04232g1.pdf]

## Supplementary Information :

# Sulfur-Doped Wood-derived Porous Carbon for Optimizing Electromagnetic Response Performance

*Haihua Hu,<sup>a</sup> Yixing Li,<sup>a,\*</sup> Tong Gao,<sup>a</sup> Siyu Yan,<sup>a</sup> Shiting Wu,<sup>b</sup> Sateesh Bandaru,<sup>b</sup> Yun Zheng,<sup>a</sup> Gaowu Qin<sup>a</sup> and Xuefeng Zhang<sup>a, b,\*</sup>*

*<sup>a</sup> Key Laboratory for Anisotropy and Texture of Materials (MOE), School of Materials Science and Engineering, Northeastern University, Shenyang 110819, P. R. China*

*<sup>b</sup> Institute of Advanced Magnetic Materials, College of Materials & Environmental Engineering, Hangzhou Dianzi University, Hangzhou 310012, P. R. China*

---

\* Corresponding authors.

*E-mail addresses:* zhangxf@atm.neu.edu.cn (X. F. Zhang), liyx@mail.neu.edu.cn (Y.X. Li)

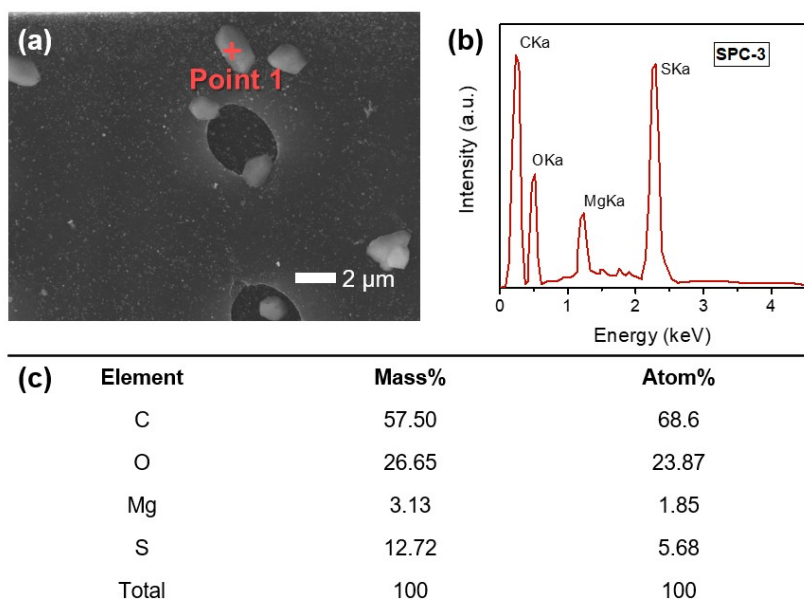

**Fig. S1** The EDS elemental point-scanned of the nanoparticles for the SPC-3 sample. (a) The SEM image; (b) Spectrum; (c) The table of the contents of elements.

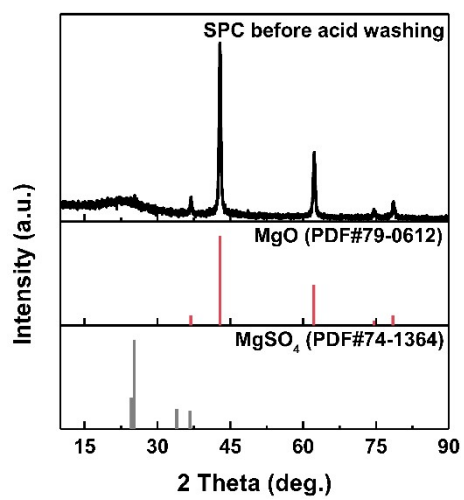

**Fig. S2** XRD patterns of SPC samples before acid washing.

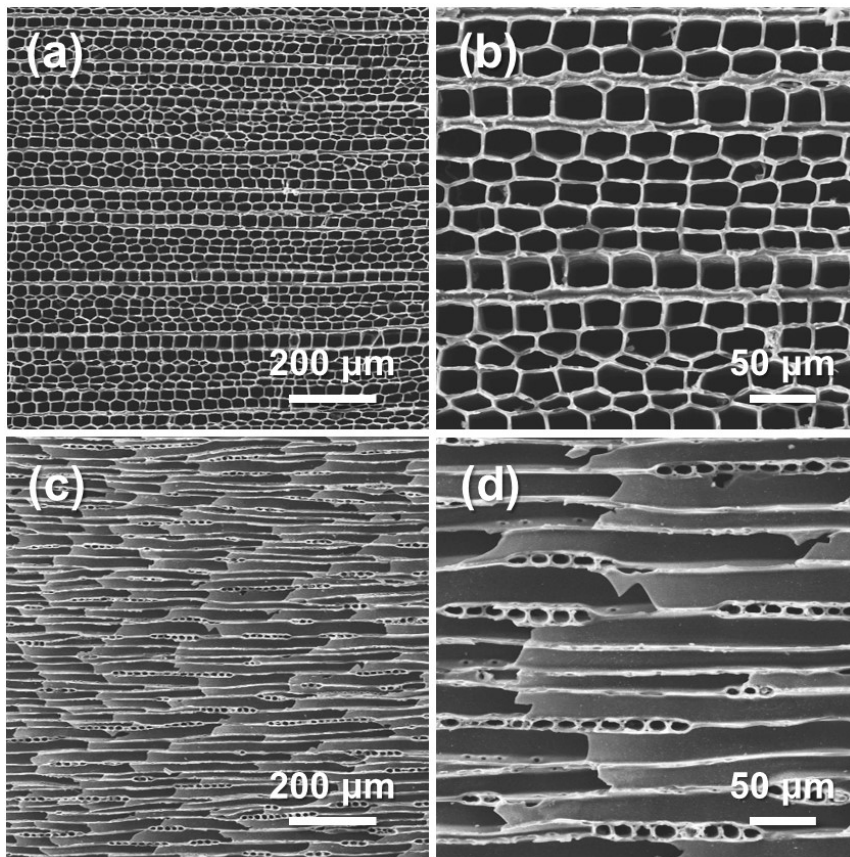

**Fig. S3** Microstructure characterization of PC.

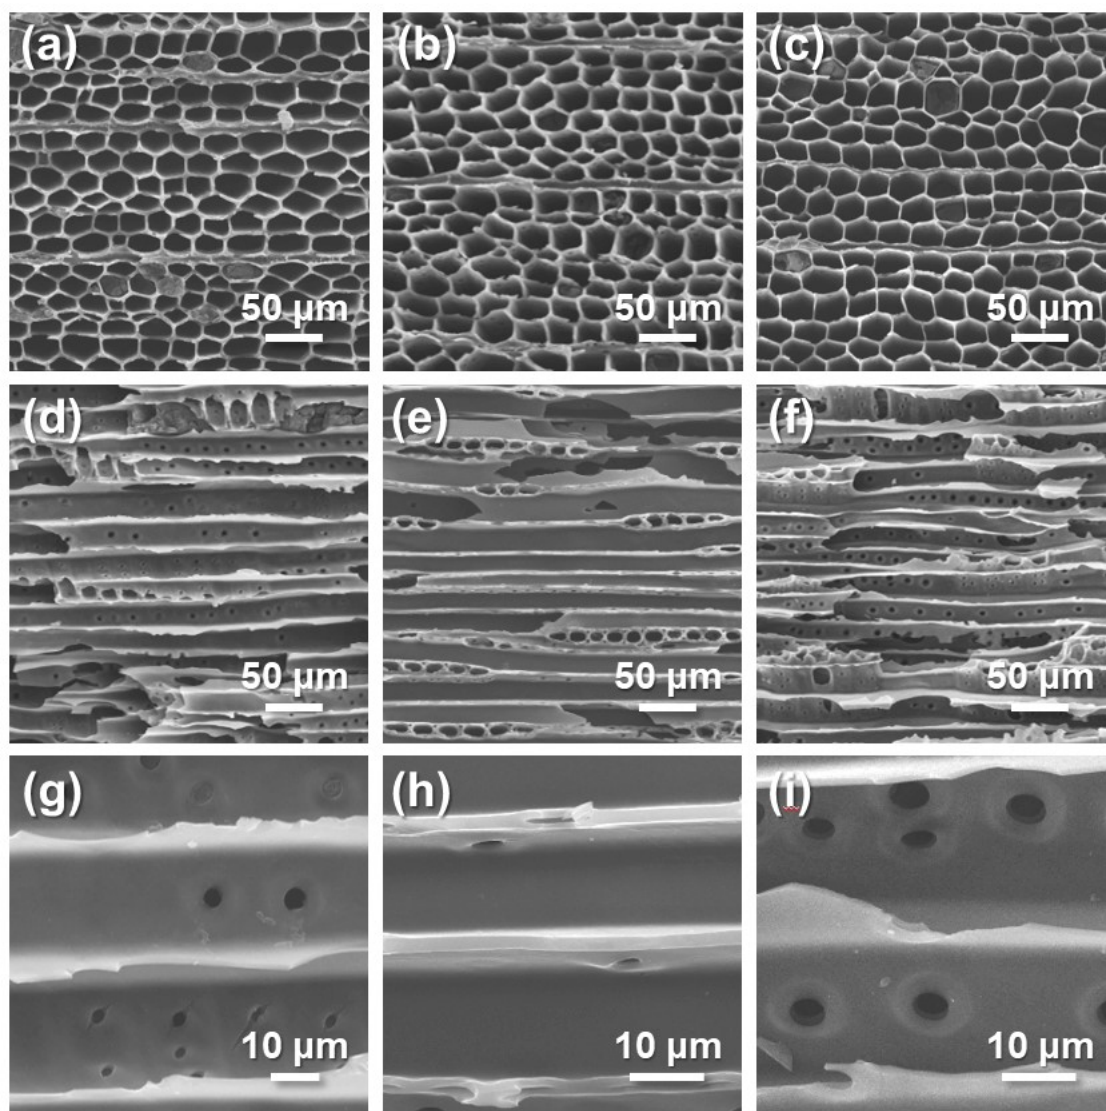

**Fig. S4** Microstructure characterization of (a), (d), (g) SPC-1, (b), (e), (h) SPC-2 and (c), (f), (i) SPC-3.

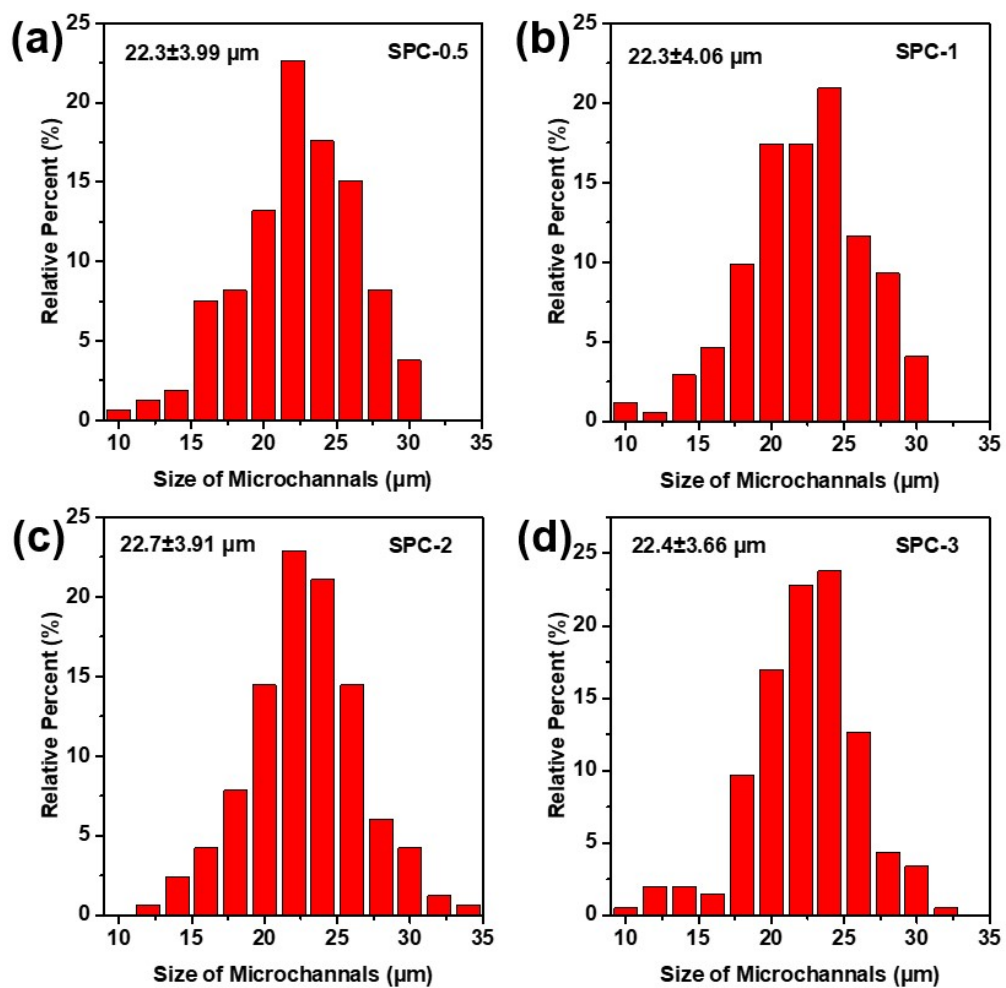

**Fig. S5** Dimension statistical graph of microchannels in (a) SPC-0.5, (b) SPC-1, (c) SPC-2 and (d) SPC-3.

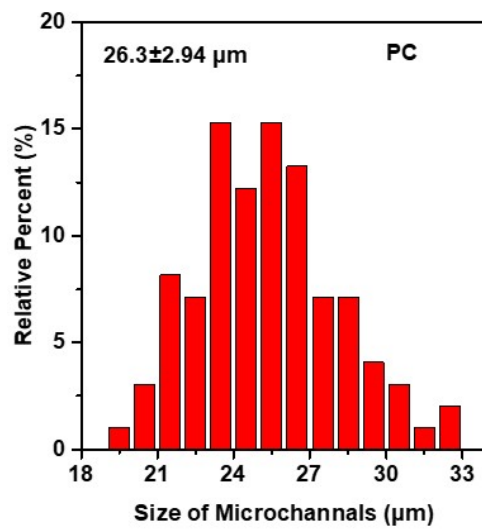

**Fig. S6** Dimension statistical graph of microchannels for the PC sample.

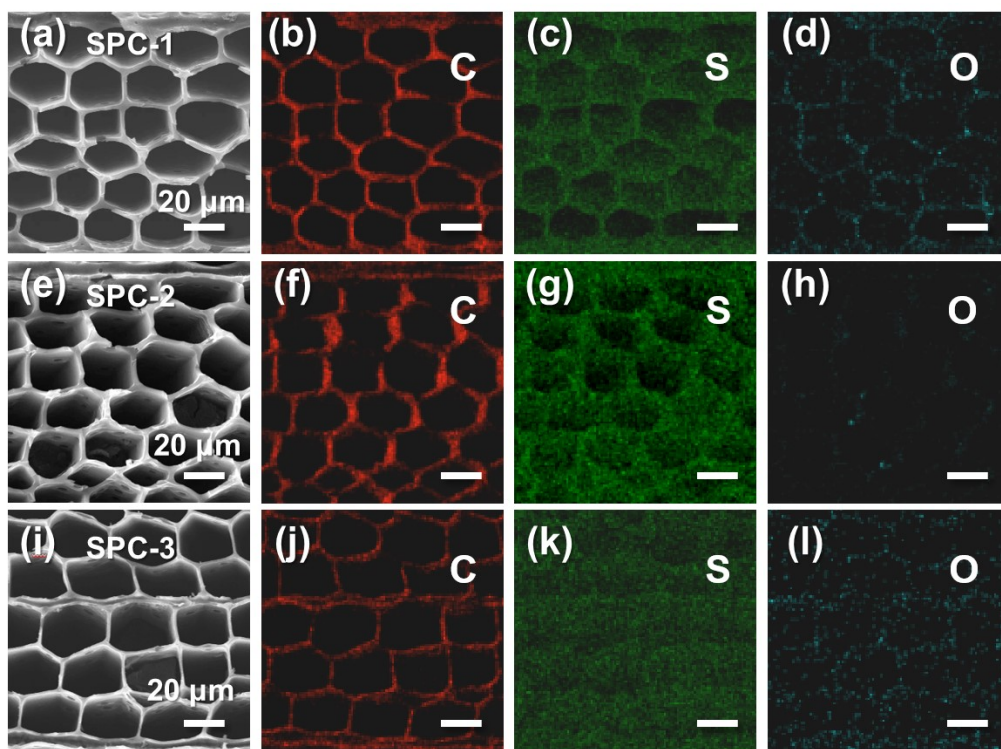

**Fig. S7** Microstructure characterization of SPC-1, SPC-2, and SPC-3, and elemental-mapping images of C, S, and O, respectively.



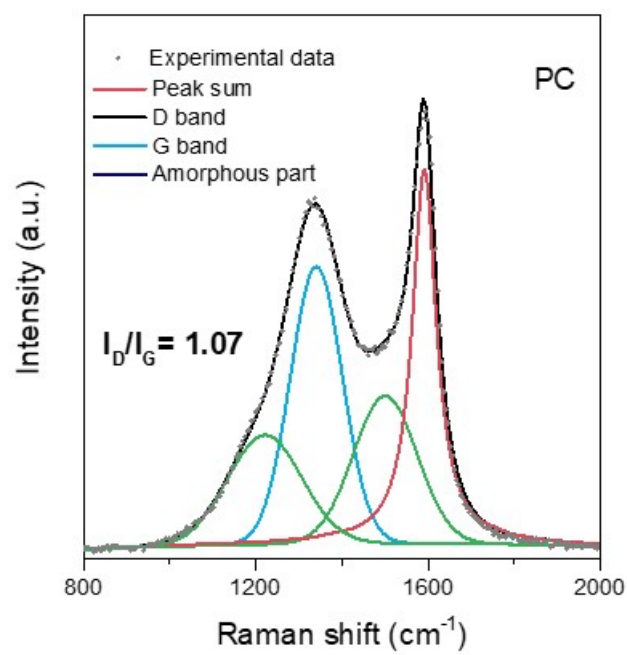

**Fig. S8** Raman spectrum of the PC sample.

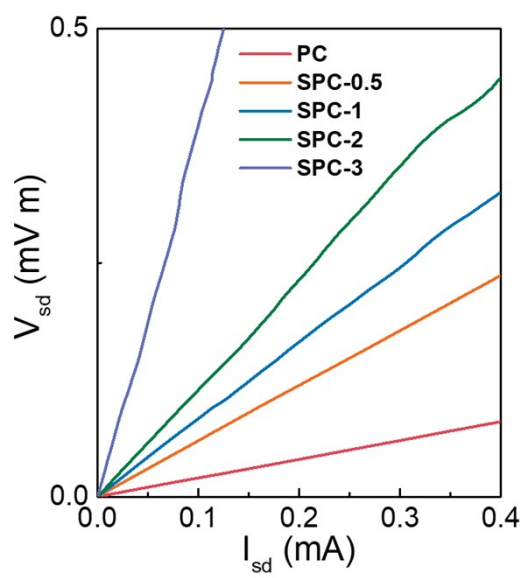

**Fig. S9** The I-V curves for PC and SPC samples.

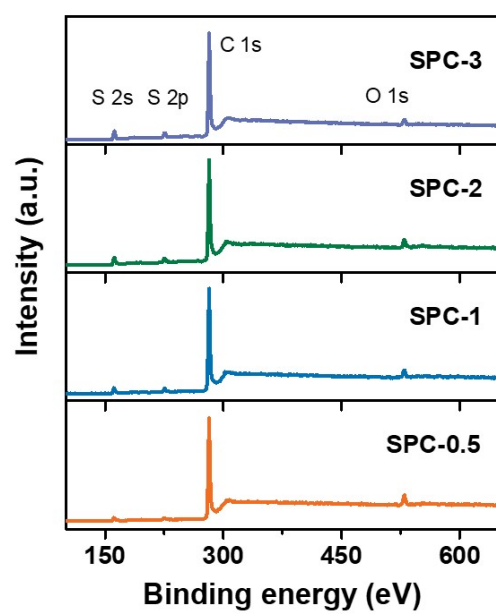

**Fig. S10** X-ray photoelectron spectroscopy for SPC-0.5, 1, 2 and 3.

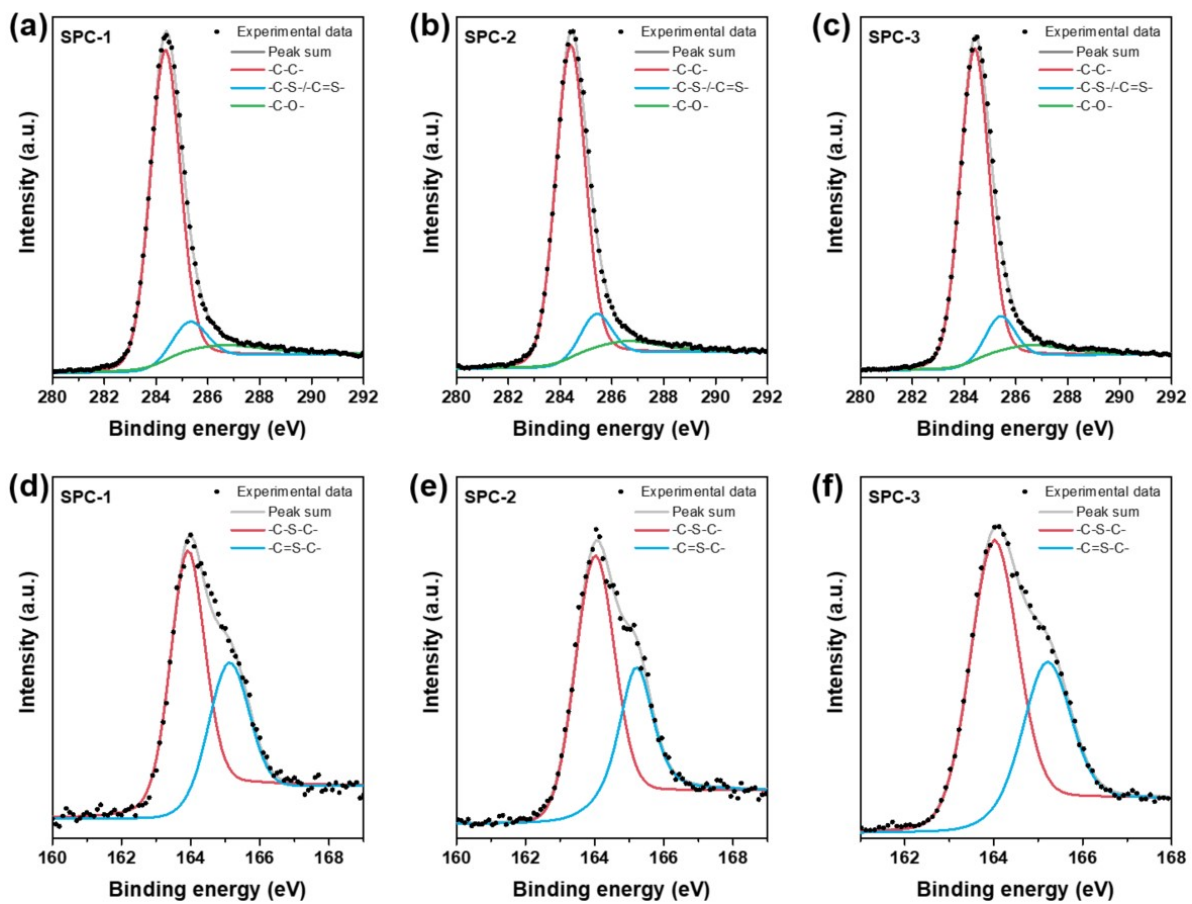

Fig. S11 XPS spectra of  $C_{1s}$  a-c and  $S_{2p}$  d-f peaks for SPC-1, 2, 3 samples.

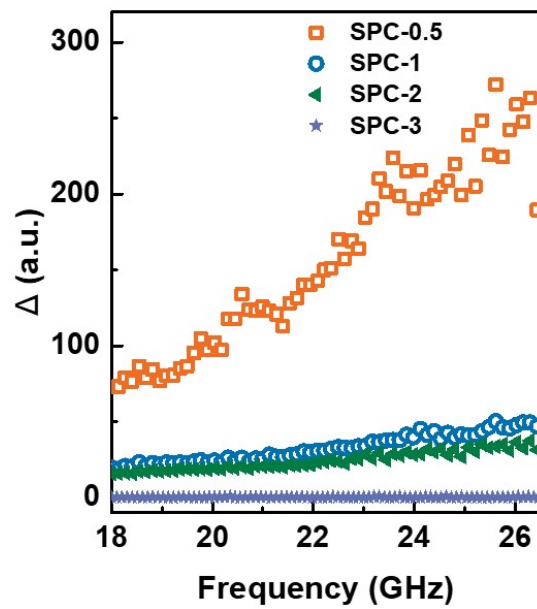

**Fig. S12** Impedance matching degree ( $\Delta$ ) dependent of frequency of SPC-0.5, SPC-1, SPC- 2 and SPC- 3 with the thickness of 2 mm.

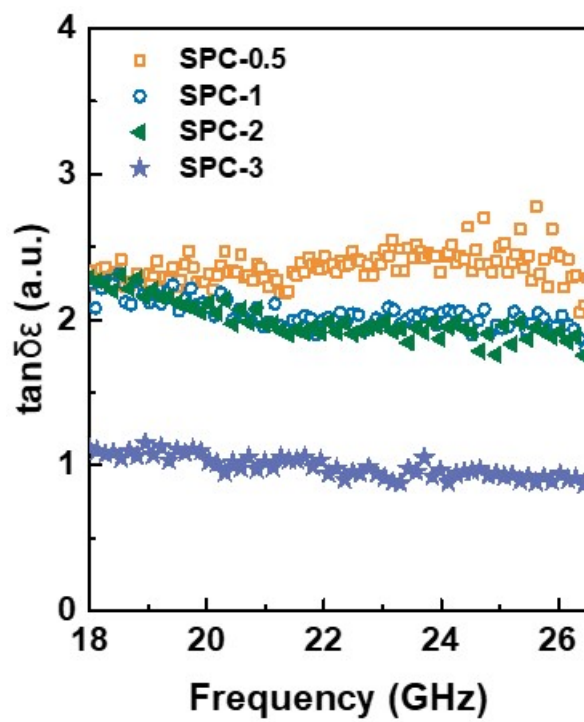

**Fig. S13** The dielectric loss tangent ( $\tan \delta \epsilon$ ) of SPC samples.

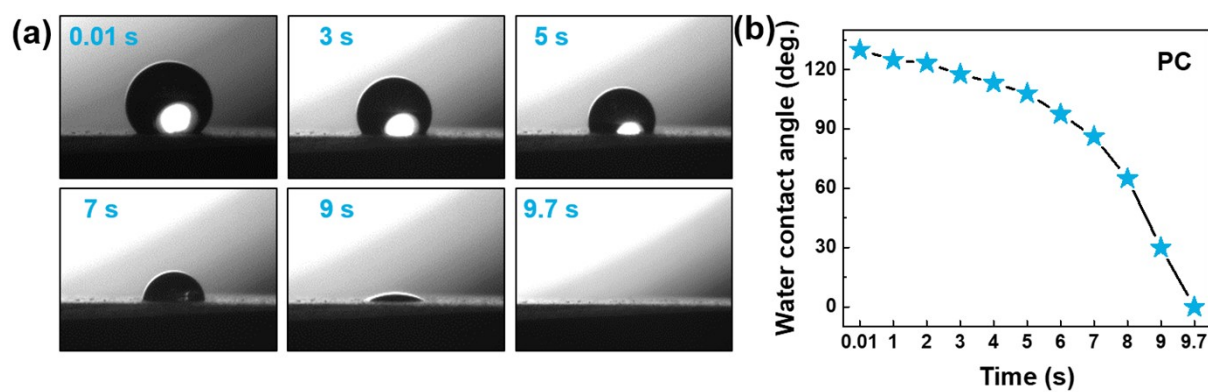

**Fig. S14** (a) The wetting behavior of the water droplet on the surface of the PC and (b) the change of water contact angles during the wetting behavior test.

**Table S1** Contents of Elements including C, S and O for SPC-0.5, SPC-1, SPC-2 and SPC-3.

| <b>Sample</b> | <b>Carbon (at. %)</b> | <b>Sulfur (at. %)</b> | <b>Oxygen (at. %)</b> |
|---------------|-----------------------|-----------------------|-----------------------|
| SPC-0.5       | 95.11                 | 2.86                  | 2.03                  |
| SPC-1         | 93.42                 | 3.77                  | 2.81                  |
| SPC-2         | 92.98                 | 5.29                  | 1.73                  |
| SPC-3         | 91.47                 | 8.33                  | 0.2                   |



**Table S2** The microwave absorption performance of PC and SPC samples compared with other reported carbon-based materials.

| Sample                                                         | Thickness (mm) | RL <sub>min</sub> (dB) | Effective bandwidth (GHz) | Ref.             |
|----------------------------------------------------------------|----------------|------------------------|---------------------------|------------------|
| Graphene@Fe                                                    | 2.0            | -27                    | 4.25                      | S1               |
| Graphene@Fe <sub>3</sub> O <sub>4</sub> @SiO <sub>2</sub> @NiO | 3.0            | -27                    | 4.8                       | S2               |
| 3D graphene-Fe <sub>3</sub> O <sub>4</sub>                     | 3.0            | -22.5                  | 4.8                       | S3               |
| RGO/MnFe <sub>2</sub> O <sub>4</sub>                           | 3.0            | -29                    | 5                         | S4               |
| N-rGA/Ni                                                       | 2.4            | -27                    | 6.7                       | S5               |
| CoFe <sub>2</sub> O <sub>4</sub> /C/PANI                       | 2.5            | -33.6                  | 8.8                       | S6               |
| ZnO/Carbon foam                                                | 2.35           | -35.7                  | 2.75                      | S7               |
| N-doped porous carbon foam                                     | 2              | -46                    | 5.4                       | S8               |
| Fe <sub>3</sub> O <sub>4</sub> /CF                             | 2.5            | -27                    | 5.2                       | S9               |
| Cobalt/helical carbon fiber                                    | 2.0            | -30                    | 6.2                       | S10              |
| Accordion-like Ni@C                                            | 1.8            | -86.9                  | 6.6                       | S11              |
| Nickel/Porous Carbon                                           | 1.8            | -28.4                  | 4.5                       | S12              |
| Cobalt/H-Porous carbon                                         | 2.4            | -21                    | 6.2                       | S13              |
| Nickel/H-Porous carbon                                         | 2.5            | -19                    | 8.3                       | S13              |
| Mo <sub>2</sub> C/ Porous carbon                               | 2.21           | -45.3                  | 3.96                      | S14              |
| hierarchically tubular C/Co                                    | 2              | -52.3                  | 5                         | S15              |
| ZFC-700                                                        | 1.5            | -30.4                  | 4.96                      | S16              |
| Fe <sub>3</sub> O <sub>4</sub> /CNT                            | 2              | -26.5                  | 6.8                       | S17              |
| Fe <sub>2</sub> O <sub>3</sub> /CNT                            | 1.5            | -22                    | 4.8                       | S18              |
| FeSiAl/CNT                                                     | 2              | -22                    | 4.2                       | S19              |
| PANI/Fe <sub>3</sub> O <sub>4</sub> /CNT                       | 4              | -17                    | 7.2                       | S20              |
| <b>PC</b>                                                      | <b>1.92</b>    | <b>-19.76</b>          | <b>5.01</b>               | <b>This work</b> |
| <b>SPC-2</b>                                                   | <b>1.91</b>    | <b>-32.76</b>          | <b>6.4</b>                | <b>This work</b> |

Table S3 The proportions of  $SE_A$  and  $SE_R$  in the total SE value.

| <b>Sample</b>  | <b><math>SE_R</math> (dB)</b> | <b><math>SE_R/SE</math> (%)</b> | <b><math>SE_A</math> (dB)</b> | <b><math>SE_A/SE</math> (%)</b> |
|----------------|-------------------------------|---------------------------------|-------------------------------|---------------------------------|
| SPC (Original) | 1.43                          | 31.9                            | 6.6                           | 68.1                            |
| SPC-10 min     | 1.71                          | 34.9                            | 9.7                           | 65.1                            |
| SPC-15 min     | 2.1                           | 39.7                            | 12.4                          | 60.3                            |
| SPC-20 min     | 2.53                          | 43.5                            | 17.8                          | 56.5                            |
| SPC-25 min     | 3.2                           | 51.9                            | 26.5                          | 48.0                            |
| SPC-30 min     | 3.4                           | 54.3                            | 27.5                          | 45.7                            |

## References

- S1 X. Zhao, Z. Zhang, L. Wang, K. Xi, Q. Cao, D. Wang, Y. Yang and Y. Du, *Sci. Rep.*, 2013, **3**, 3421.
- S2 L. Wang, Y. Huang, X. Sun, H. Huang, P. Liu, M. Zong and Y. Wang, *Nanoscale*, 2014, **6**, 3157-3164.
- S3 C. Hu, Z. Mou, G. Lu, N. Chen, Z. Dong, M. Hu and L. Qu, *Phys. Chem. Chem. Phys.*, 2013, **15**, 13038-13043.
- S4 X. J. Zhang, G. S. Wang, W. Q. Cao, Y. Z. Wei, J. F. Liang, L. Guo and M.-S. Cao, *ACS Appl. Mater. Interfaces*, 2014, **6**, 7471-7478.
- S5 J. Tang, N. Liang, L. Wang, J. Li, G. Tian, D. Zhang, S. Feng and H. Yue, *Carbon*, 2019, **152**, 575-586.
- S6 T. Hou, Z. Jia, A. Feng, Z. Zhou, X. Liu, H. Lv and G. Wu, *J. Mater. Sci. Tech.*, 2020, **68**, 61-69.
- S7 X. Liang, B. Quan, Z. Man, B. Cao, N. Li, C. Wang, G. Ji and T. Yu, *ACS Appl. Mater. Interfaces*, 2019, **11**, 30228-30233.
- S8 J. Yan, Y. Huang, C. Chen, X. Liu and H. Liu, *Carbon*, 2019, **152**, 545-555.
- S9 Y. Liu, Z. Chen, W. Xie, S. Song, Y. Zhang and L. Dong, *ACS Sustain. Chem. Eng.*, 2019, **7**, 5318-5328.
- S10 F. Wu, K. Yang, Q. Li, T. Shah, M. Ahmad, Q. Zhang and B. Zhang, *Carbon*, 2021, **173**, 918-931.
- S11 Z. Xiang, C. Huang, Y. Song, B. Deng, X. Zhang, X. Zhu, D. Batalu, O. Tutunaru and W. Lu, *Carbon*, 2020, **167**, 364-377.

- S12 S. Qiu, H. Lyu, J. Liu, Y. Liu, N. Wu and W. Liu, *ACS Appl. Mater. Interfaces*, 2016, **8**, 20258-20266.
- S13 T. Huang, Z. Wu, Q. Yu, D. Tan and L. Li, *Chem. Eng. J.*, 2019, **359**, 69-78.
- S14 S. Dai, Y. Cheng, B. Quan, X. Liang, W. Liu, Z. Yang, G. Ji and Y. Du, *Nanoscale*, 2018, **10**, 6945-6953.
- S15 Z. Wu, K. Pei, L. Xing, X. Yu, W. You and R. Che, *Adv. Funct. Mater.*, 2019, **29**, 1901448.
- S16 W. Liu, L. Liu, G. Ji, D. Li, Y. Zhang J. Ma and Y. Du, *ACS Sustain. Chem. Eng.*, 2017, **5**, 7961-7971.
- S17 N. Li, G. W. Huang, Y. Q. Li, H. M. Xiao, Q. P. Feng , N. Hu and S.-Y. Fu, *ACS Appl. Mater. Interfaces*, 2017, **9**, 2973-2983.
- S18 L. Wang, X. Yu, X. Li, J. Zhang, M. Wang and R. Che, *Carbon*, 2019, **155**, 298-308.
- S19 L. Huang, X. Liu, D. Chuai, Y. Chen and R. Yu, *Sci. Rep.*, 2016, **6**, 1-12.
- S20 M. S. Cao, J. Yang, W. L. Song, D. Q. Zhang, B. Wen H.-B. Jin, Z.-L. Hou and J. Yuan, *ACS Appl. Mater. Interfaces*, 2012, **4**, 6949-6956.
